# Supplementary material for: A solvent-induced crystal-facet effect of nickel–cobalt layered double hydroxides for highly efficient overall water splitting
Source: Royal Society of Chemistry journal article supplement (doi:10.1039/d2qi01470j), 2022-01-01
Supplement: d2qi01470j1.pdf [file d2qi01470j1.pdf]

# Solvent-induced crystal-facet effect of nickel-cobalt layered double hydroxide for highly efficient overall water splitting

*Lingxing Zan<sup>a</sup>, Hongling Zhang<sup>a</sup>, Zhangwen Ye<sup>a</sup>, Qingbo Wei<sup>a</sup>, Hongliang Dong<sup>d</sup>,*

*Shiwen Sun<sup>a</sup>, Qiang Weng<sup>f</sup>, Xin Bo<sup>e</sup>, Huicong Xia<sup>b\*</sup>, Yibing Li<sup>c\*</sup>, Feng Fu<sup>a\*</sup>*

<sup>a</sup> Key Laboratory of Chemical Reaction Engineering of Shaanxi Province; College of Chemistry & Chemical Engineering, Yan'an University, Yan'an 716000, China.

<sup>b</sup> College of Materials Science and Engineering, Zhengzhou University, Zhengzhou 450001, China.

<sup>c</sup> Institute of Smart City and Intelligent Transportation, Southwest Jiaotong University, Chengdu, 610097, China.

<sup>d</sup> State Key Laboratory of High Performance Ceramics and Superfine Microstructure, Shanghai Institute of Ceramics, Chinese Academy of Sciences, Shanghai 201899, China.

<sup>e</sup> School of Chemistry, University of New South Wales, Sydney, Australia, 2052.

<sup>f</sup> Key Laboratory of Applied Surface and Colloid Chemistry (MOE), Shaanxi Key Laboratory for Advanced Energy Devices, Shaanxi Engineering Laboratory for Advanced Energy Technology, School of Materials Science and Engineering, Shaanxi Normal University, Xi'an, 710119, China.

E-mail: *Huicong Xia* (summer9209@126.com)

*Yibing Li* (yibing.li@swjtu.edu.cn)

*Feng Fu* (yadxfufeng@126.com)

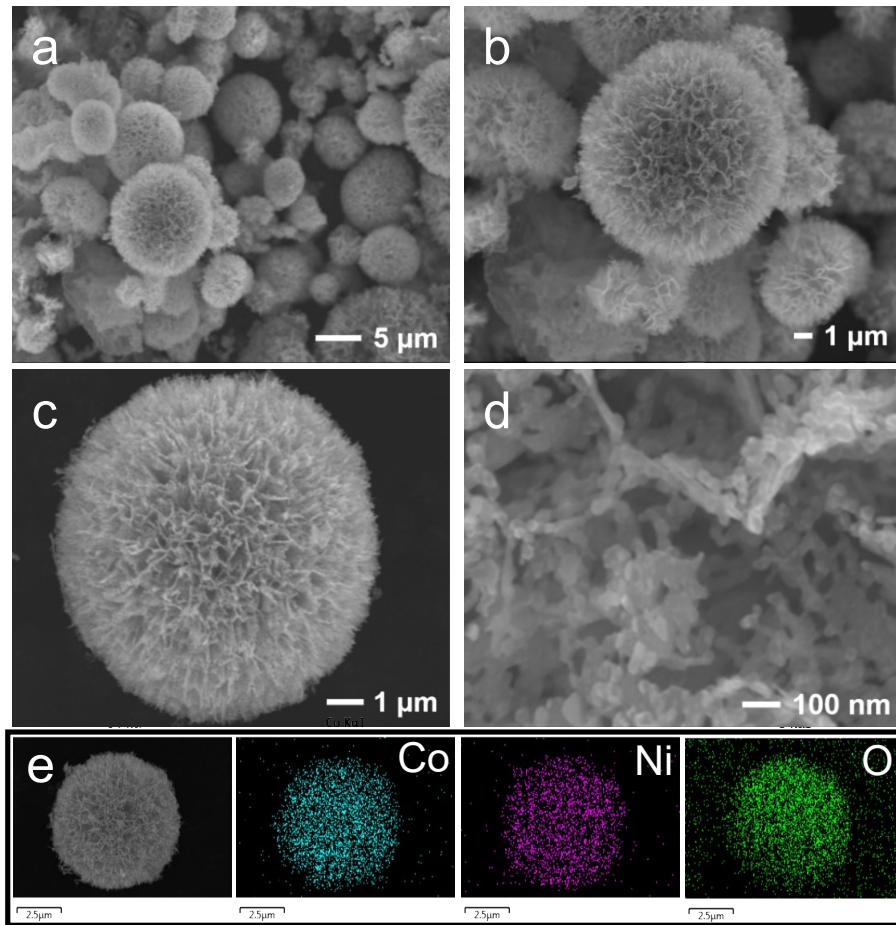

**Fig. S1** Structural characterizations of  $\text{Co}_{0.67}\text{Ni}_{0.33}(\text{OH})_2\text{-E}$ . a-d, FESEM images. e, FESEM-EDS mapping images of Co, Ni and O elements.

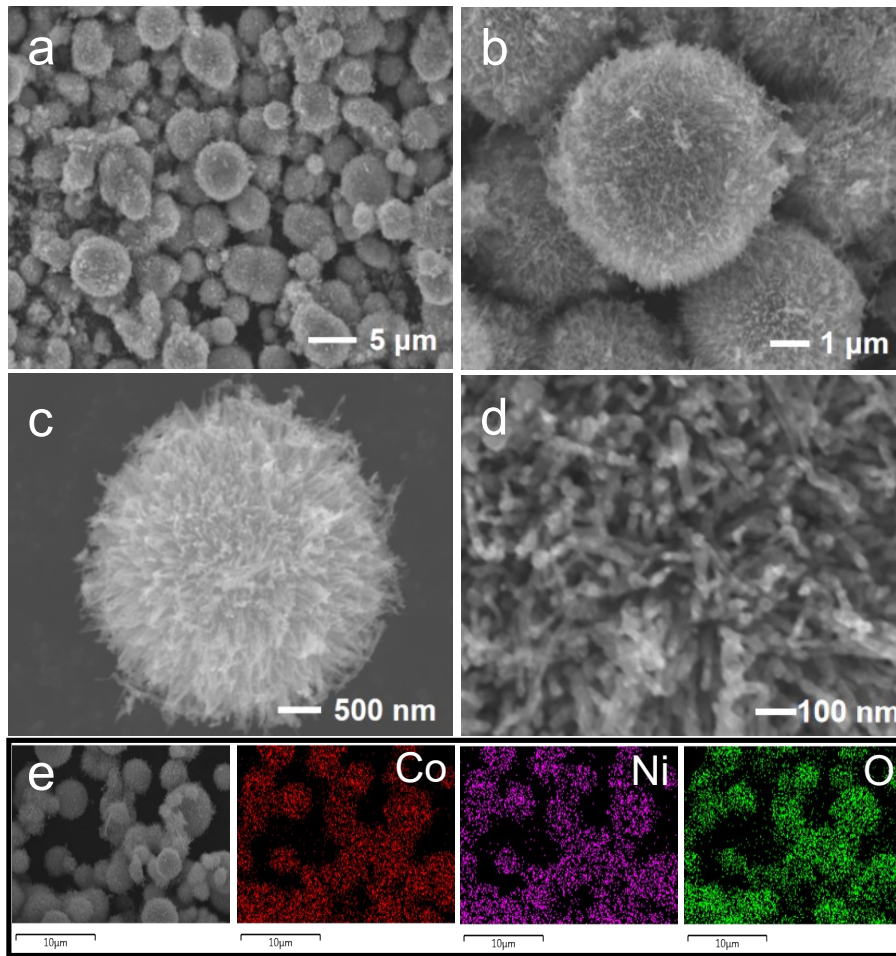

**Fig. S2** Structural characterizations of  $\text{Co}_{0.67}\text{Ni}_{0.33}(\text{OH})_2\text{-W}$ . a-d, FESEM images. e, FESEM-EDS mapping images of Co, Ni and O elements.

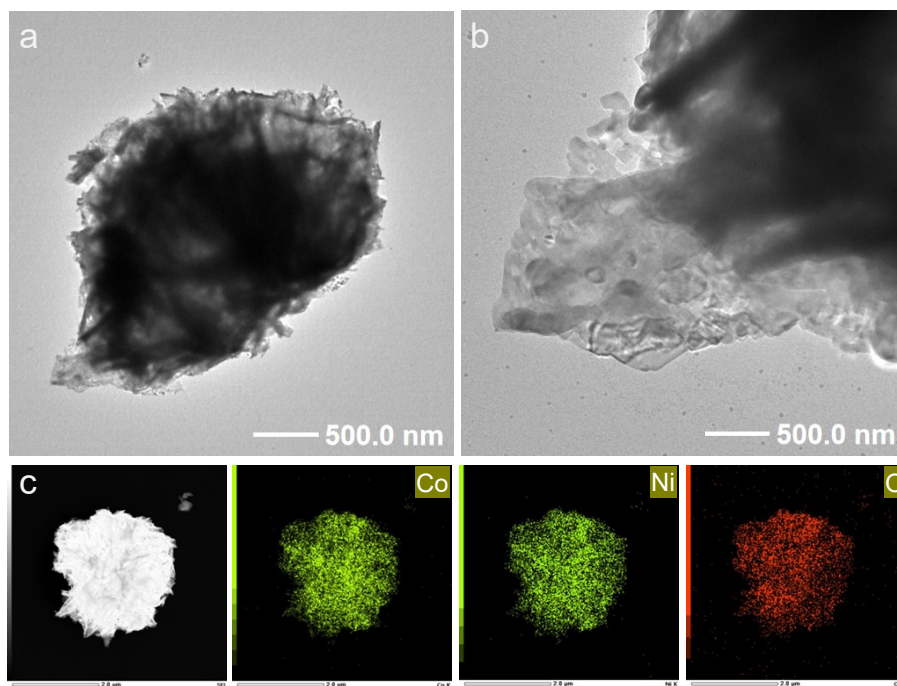

**Fig. S3** Structural characterizations of  $\text{Co}_{0.67}\text{Ni}_{0.33}(\text{OH})_2\text{-E}$ . a-b, HRTEM images. c, HRTEM-EDX mapping images of Co, Ni and O elements.

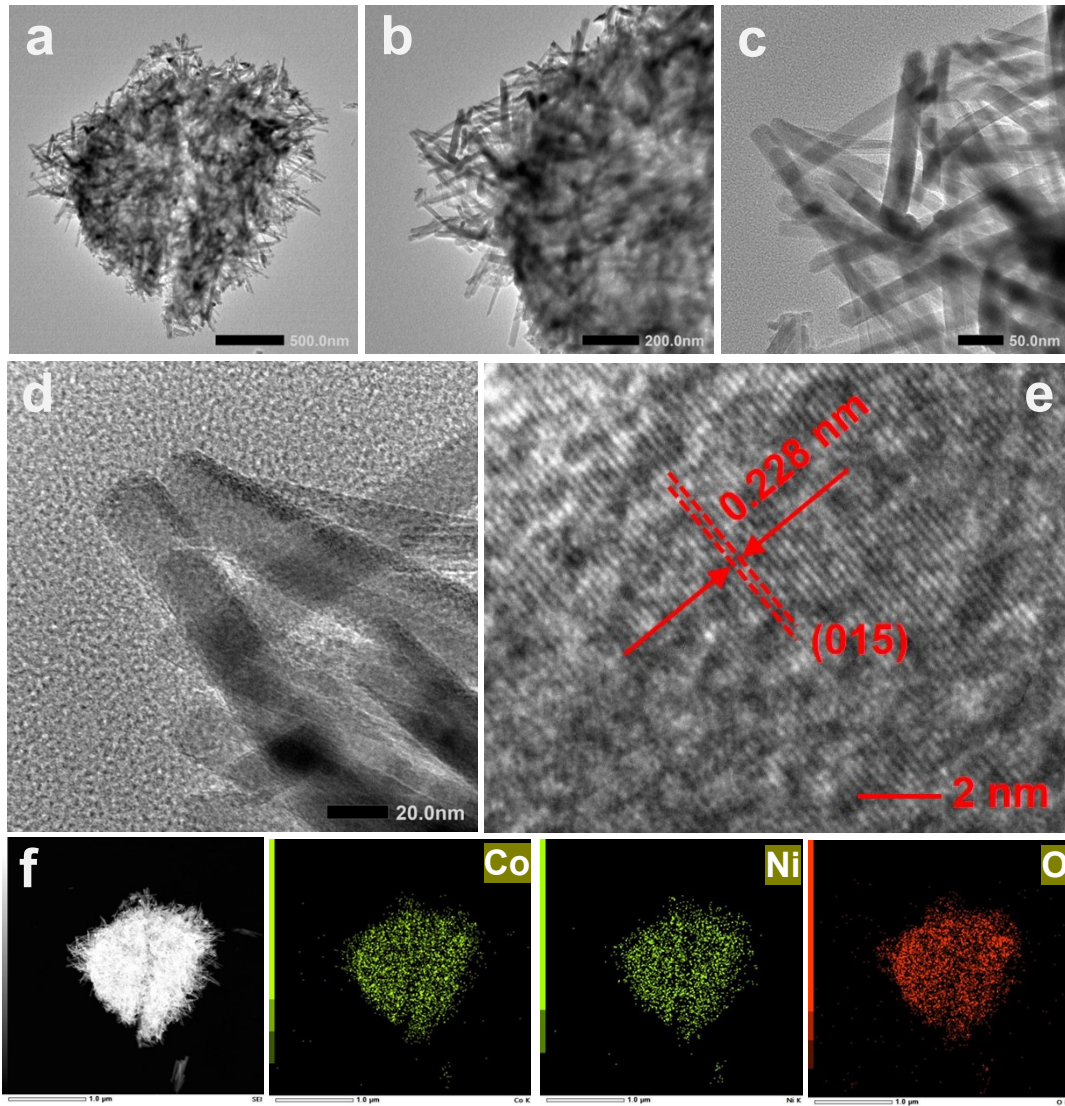

**Fig. S4** Structural characterizations of  $\text{Co}_{0.67}\text{Ni}_{0.33}(\text{OH})_2\text{-W}$ . a-b, HRTEM images. c, HRTEM-EDX mapping images of Co, Ni and O elements.



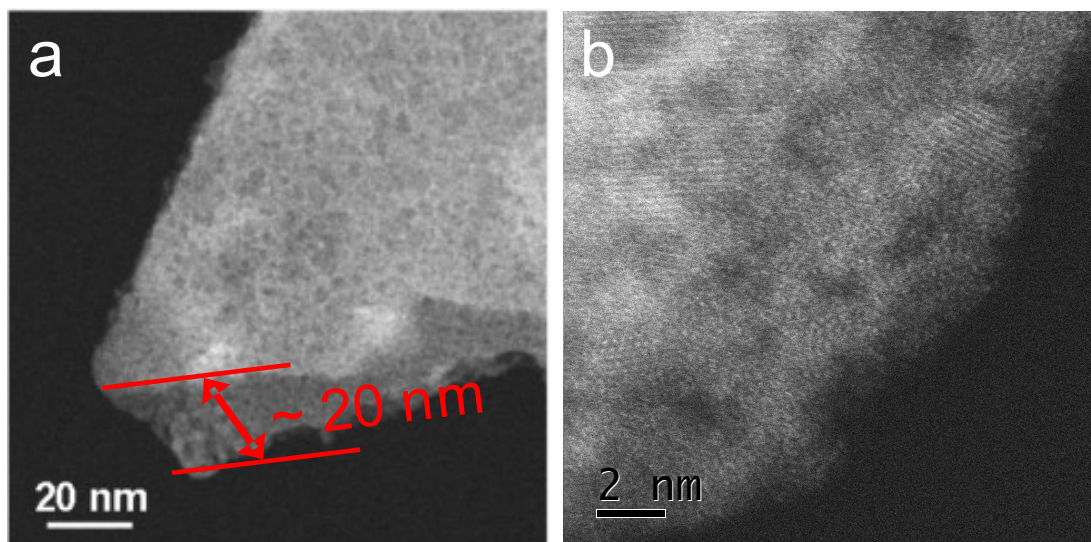

**Fig. S5** Structural characterizations of  $\text{Co}_{0.67}\text{Ni}_{0.33}(\text{OH})_2\text{-E}$ .

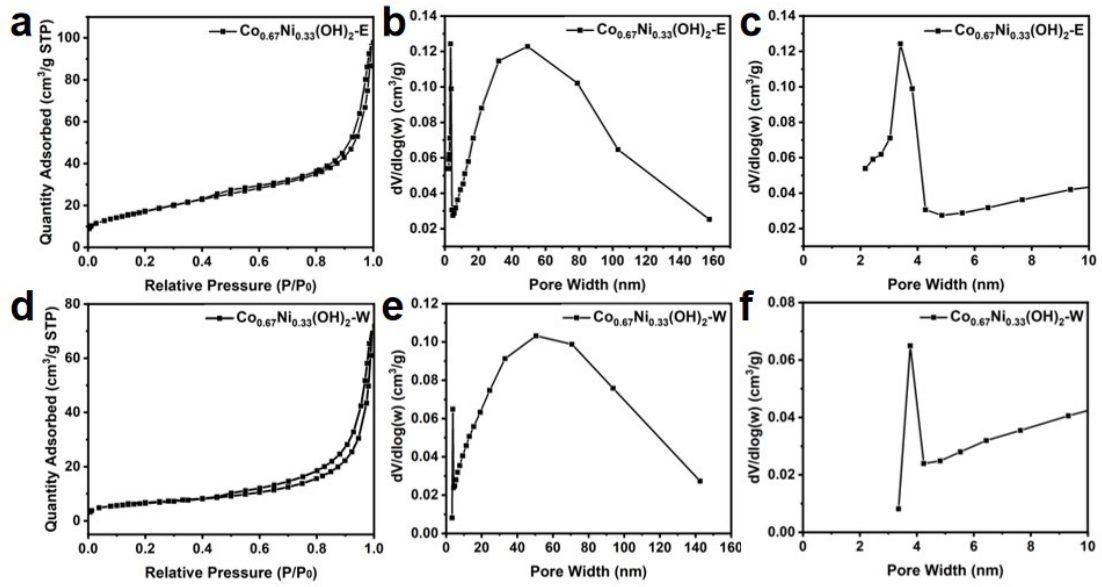

**Fig. S6** Determination of the Brunauer-Emmett-Teller (BET) surface area. Nitrogen isothermal desorption curves for (a)  $\text{Co}_{0.67}\text{Ni}_{0.33}(\text{OH})_2\text{-E}$  and (d)  $\text{Co}_{0.67}\text{Ni}_{0.33}(\text{OH})_2\text{-W}$ . Pore size distribution based on the BJH model for (b-c)  $\text{Co}_{0.67}\text{Ni}_{0.33}(\text{OH})_2\text{-E}$  and (e-f)  $\text{Co}_{0.67}\text{Ni}_{0.33}(\text{OH})_2\text{-W}$ .

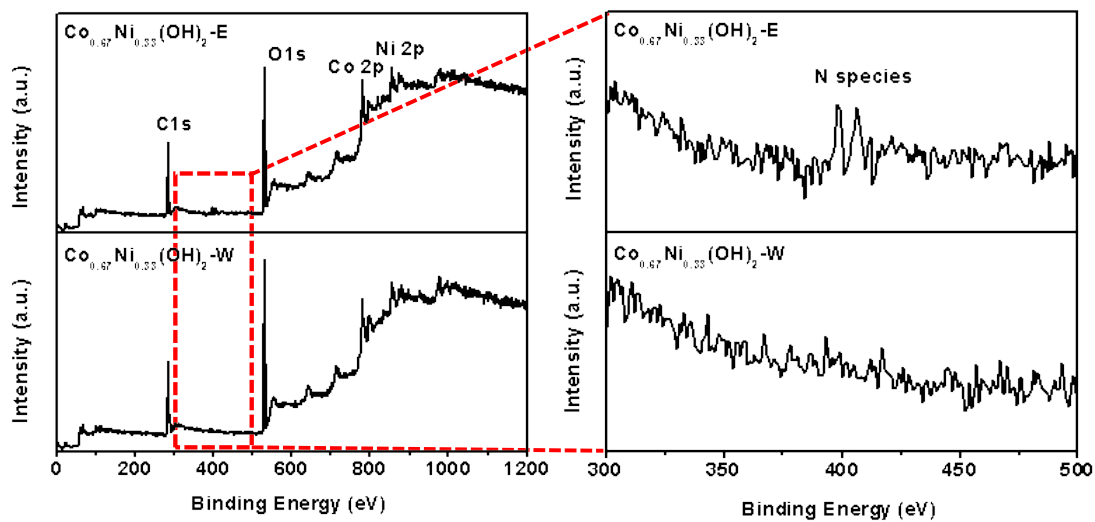

**Fig. S7** High resolution XPS spectra. The survey spectra of Co<sub>0.67</sub>Ni<sub>0.33</sub>(OH)<sub>2</sub>-E (up) and Co<sub>0.67</sub>Ni<sub>0.33</sub>(OH)<sub>2</sub>-W (down).



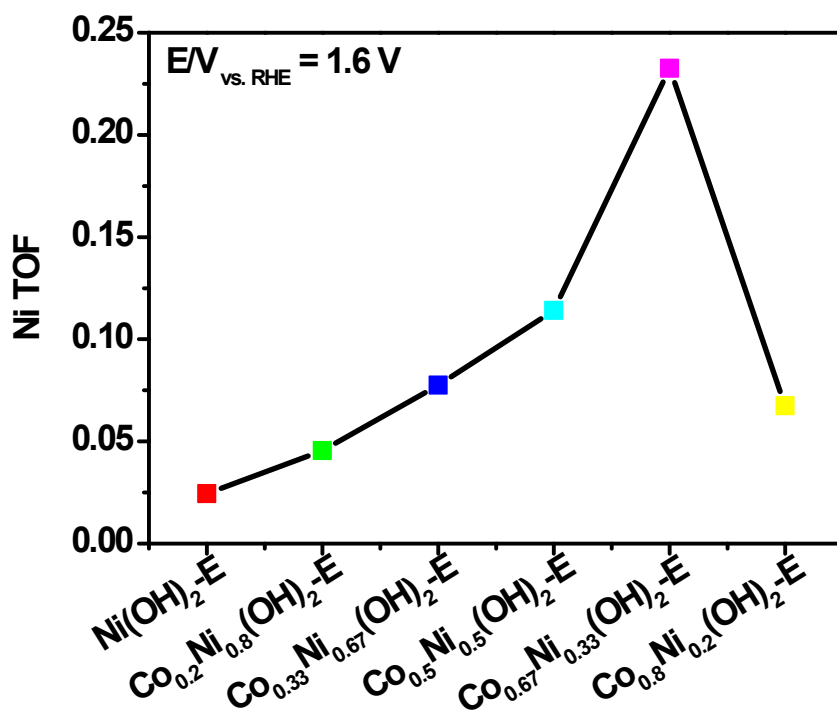

Fig. S8 Ni-TOF values of  $\text{Co}_x\text{Ni}_{1-x}(\text{OH})_2\text{-E}$  at 1.6 V.

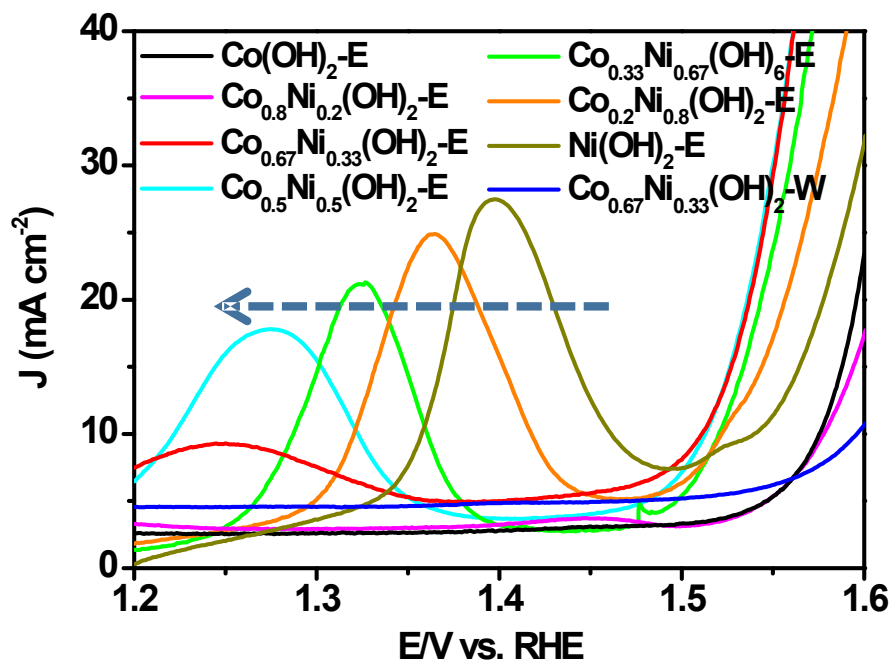

**Fig. S9** Cyclic voltammograms of  $\text{Co}_x\text{Ni}_{1-x}(\text{OH})_2$  surface in Ar-saturated 1 M KOH solution at a scan rate of  $5 \text{ mV s}^{-1}$ .

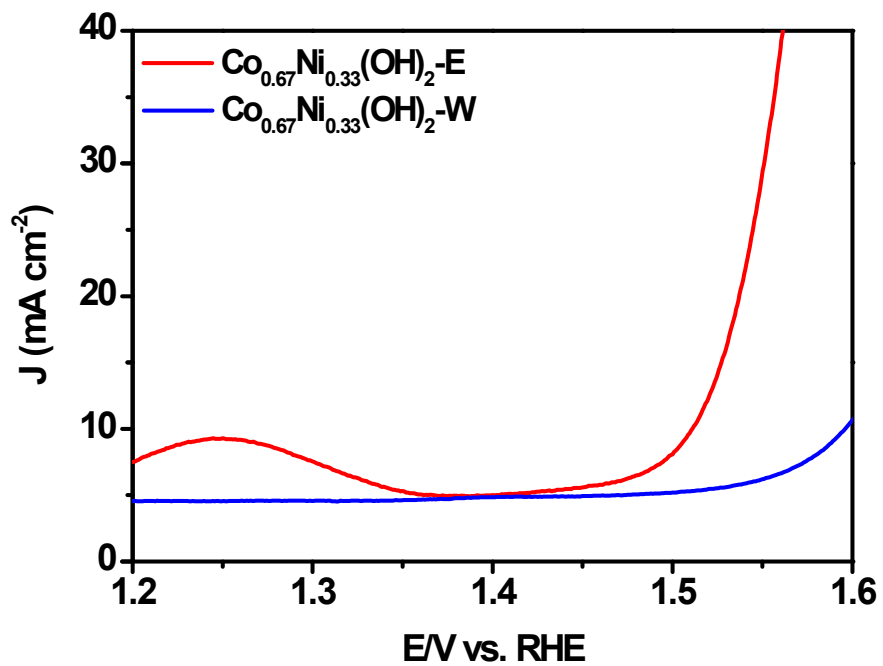

**Fig. S10** Cyclic voltammograms of OER at  $\text{Co}_x\text{Ni}_{1-x}(\text{OH})_2\text{-E}$  and  $\text{Co}_x\text{Ni}_{1-x}(\text{OH})_2\text{-W}$  surface in Ar-saturated 1 M KOH solution at a scan rate of  $5 \text{ mV s}^{-1}$ .

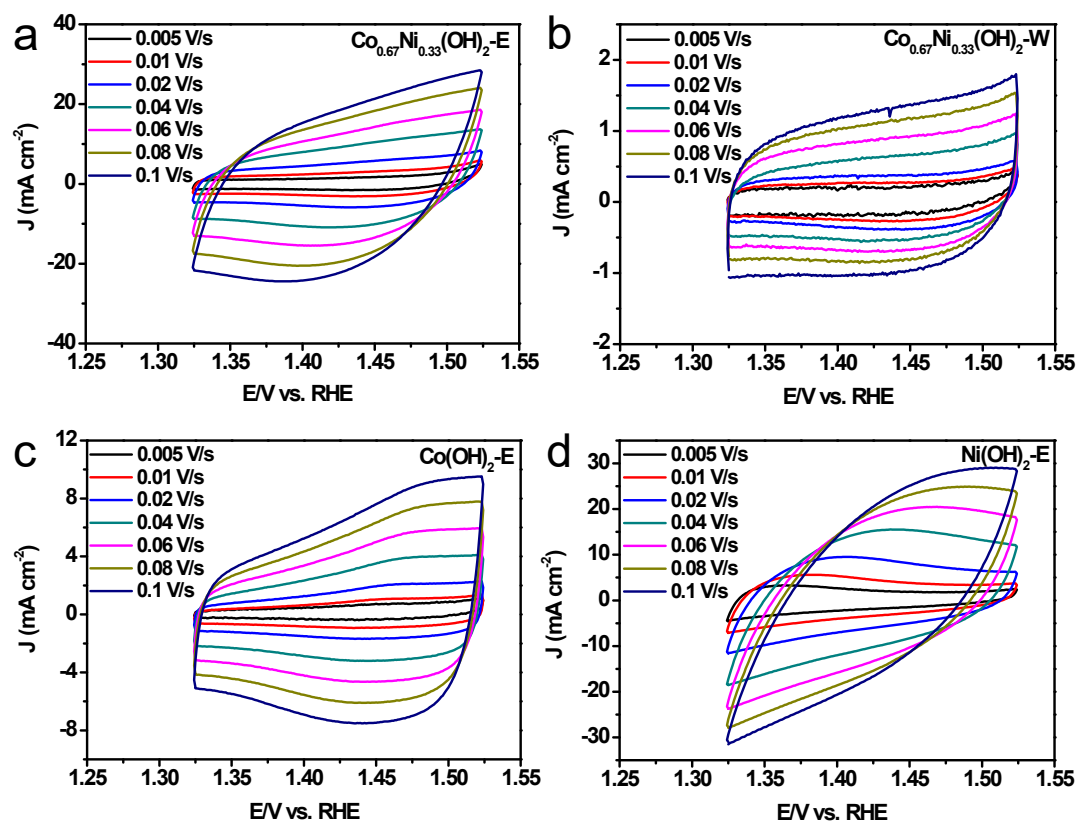

**Fig. S11** Cyclic voltammograms of  $\text{Co}_x\text{Ni}_{1-x}(\text{OH})_2$  surface in Ar-saturated 1 M KOH solution at a scan rate of  $5 \text{ mV s}^{-1}$  in the potential range of 1.325-1.525 V (vs. RHE). a,  $\text{Co}_{0.67}\text{Ni}_{0.33}(\text{OH})_2\text{-E}$ . b,  $\text{Co}_{0.67}\text{Ni}_{0.33}(\text{OH})_2\text{-W}$ . c,  $\text{Co}(\text{OH})_2\text{-E}$ . d,  $\text{Ni}(\text{OH})_2\text{-E}$ .

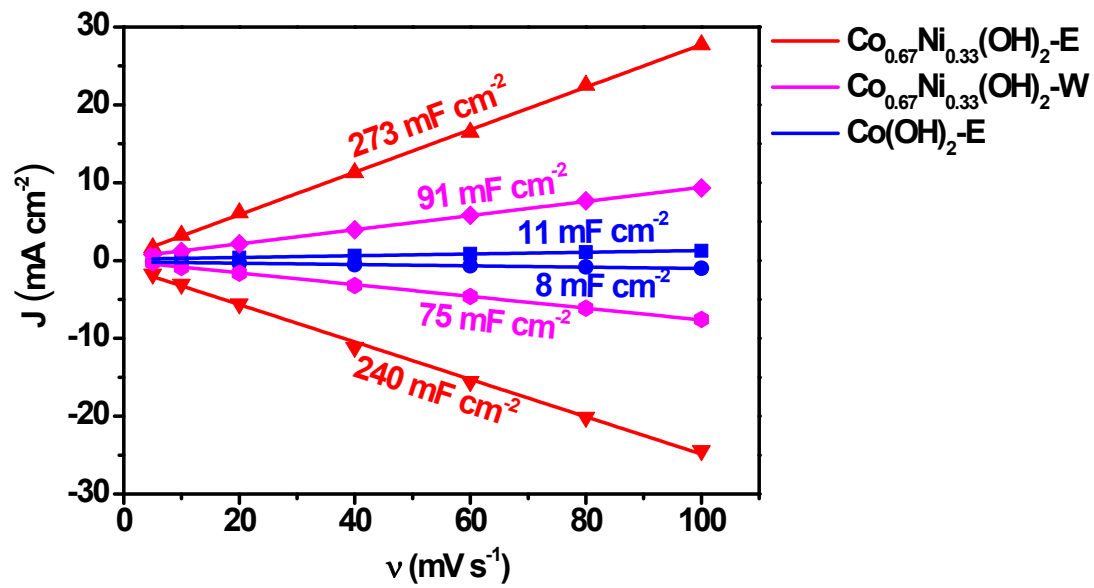

**Fig. S12** The plots of scan rates vs. current densities corresponding to the cyclic voltammograms as shown in Fig. S11.

Table S1. Comparison of the OER performances of various (Ni or Co)-based LDH catalysts and noble metal catalysts.

| Catalysts                                                                                            | Electrolyte  | Substrate          | Overpotential [mV] at<br>specific current density | Tafel slope<br>[mV dec <sup>-1</sup> ] | Ref.         |
|------------------------------------------------------------------------------------------------------|--------------|--------------------|---------------------------------------------------|----------------------------------------|--------------|
| Exfoliated NiFe LDH                                                                                  | 1 M KOH      | GC                 | 302@10 mA cm <sup>-2</sup>                        | 40                                     | 1            |
| NiO/NiCo <sub>2</sub> O <sub>4</sub>                                                                 | 1 M KOH      | GC                 | 357@10 mA cm <sup>-2</sup>                        | 130                                    | 2            |
| NiCo <sub>2</sub> P <sub>x</sub> /CNTs                                                               | 1 M KOH      | GC                 | 284@10 mA cm <sup>-2</sup>                        | 50.3                                   | 3            |
| NiFe LDH/NiFe phosphate                                                                              | 1 M KOH      | Carbon fiber paper | 290@10 mA cm <sup>-2</sup>                        | 38                                     | 4            |
| FeNi LDH/Ti <sub>3</sub> C <sub>2</sub> -MXene                                                       | 1 M KOH      | GC                 | 298@10 mA cm <sup>-2</sup>                        | 43                                     | 5            |
| CoNi LDH/CoO                                                                                         | 1 M KOH      | GC                 | 300@10 mA cm <sup>-2</sup>                        | 123                                    | 6            |
| NiCo <sub>2</sub> O <sub>4</sub> /NiCoFe LDH                                                         | 1 M KOH      | Carbon cloth       | 302@50 mA cm <sup>-2</sup>                        | 71.5                                   | 7            |
| Ni <sub>0.6</sub> Co <sub>1.4</sub> P nanocages                                                      | 1 M KOH      | GC                 | 300@10 mA cm <sup>-2</sup>                        | 80                                     | 8            |
| CoNi/NC-YS                                                                                           | 1 M KOH      | Carbon fiber paper | 292@10 mA cm <sup>-2</sup>                        | 53.8                                   | 9            |
| CoNi-Fe <sub>3</sub> N                                                                               | 1 M KOH      | Iron foil          | 285@10 mA cm <sup>-2</sup>                        | 34                                     | 10           |
| Ni <sub>0.75</sub> Fe <sub>0.25</sub> -LDH                                                           | 1 M KOH      | GC                 | ~300@10 mA cm <sup>-2</sup>                       | ~50                                    | 11           |
| NiCo-LDH nanosheets                                                                                  | 1 M KOH      | GC                 | ~350@10 mA cm <sup>-2</sup>                       | 41                                     | 1            |
| NiCo LDH nanoplates                                                                                  | 1 M KOH      | Carbon paper       | 367@10 mA cm <sup>-2</sup>                        | 40                                     | 12           |
| Co <sub>1.8</sub> Ni(OH) <sub>5.6</sub> @Co <sub>1.8</sub> NiS <sub>0.4</sub><br>(OH) <sub>4.8</sub> | 0.1 M<br>KOH | GC                 | 274@10 mA cm <sup>-2</sup>                        | 45                                     | 13           |
| IrO <sub>2</sub> @SL-NiFe LDHs                                                                       | 1 M KOH      | GC                 | 270@10 mA cm <sup>-2</sup>                        | 59                                     | 14           |
| SL-NiFe LDHs                                                                                         | 1 M KOH      | GC                 | 343@10 mA cm <sup>-2</sup>                        | 139                                    | 14           |
| IrO <sub>2</sub>                                                                                     | 1 M KOH      | GC                 | 325@10 mA cm <sup>-2</sup>                        | 45                                     | 1            |
| RuO <sub>2</sub>                                                                                     | 1 M KOH      | GC                 | 291@10 mA cm <sup>-2</sup>                        | 81                                     | 15           |
| Co <sub>0.67</sub> Ni <sub>0.33</sub> (OH) <sub>2</sub> -E                                           | 1 M KOH      | GC                 | 280@10 mA cm <sup>-2</sup>                        | 81                                     | This<br>work |



## References

1. F. Song and X. Hu, Exfoliation of layered double hydroxides for enhanced oxygen evolution catalysis, *Nat. Commun.*, 2014, **5**, 4477.
2. Z. Zhang, X. Liang, J. Li, J. Qian, Y. Liu, S. Yang, Y. Wang, D. Gao and D. Xue, Interfacial engineering of NiO/NiCo<sub>2</sub>O<sub>4</sub> porous nanofibers as efficient bifunctional catalysts for rechargeable zinc-air batteries, *ACS Appl. Mater. Interfaces*, 2020, **12**, 21661-21669.
3. C. Huang, T. Ouyang, Y. Zou, N. Li and Z.-Q. Liu, Ultrathin NiCo<sub>2</sub>P<sub>x</sub> nanosheets strongly coupled with CNTs as efficient and robust electrocatalysts for overall water splitting, *J. Mater. Chem. A*, 2018, **6**, 7420-7427.
4. Y. Li and C. Zhao, Enhancing water oxidation catalysis on a synergistic phosphorylated NiFe hydroxide by adjusting catalyst wettability, *ACS Catal.*, 2017, **7**, 2535-2541.
5. M. Yu, S. Zhou, Z. Wang, J. Zhao and J. Qiu, Boosting electrocatalytic oxygen evolution by synergistically coupling layered double hydroxide with MXene, *Nano Energy*, 2018, **44**, 181-190.
6. J. Wu, Z. Ren, S. Du, L. Kong, B. Liu, W. Xi, J. Zhu and H. Fu, A highly active oxygen evolution electrocatalyst: ultrathin CoNi double hydroxide/CoO nanosheets synthesized via interface-directed assembly, *Nano Res.*, 2016, **9**, 713-725.
7. Y. Liu, Y. Bai, Y. Han, Z. Yu, S. Zhang, G. Wang, J. Wei, Q. Wu and K. Sun, Self-supported hierarchical FeCoNi-LTH/NiCo<sub>2</sub>O<sub>4</sub>/CC electrodes with enhanced bifunctional performance for efficient overall water splitting, *ACS Appl. Mater. Interfaces*, 2017, **9**, 36917-36926.
8. B. Qiu, L. Cai, Y. Wang, Z. Lin, Y. Zuo, M. Wang and Y. Chai, Fabrication of nickel-cobalt bimetal phosphide nanocages for enhanced oxygen evolution catalysis, *Adv. Funct. Mater.*, 2018, **28**, 1706008.
9. G. Hou, X. Jia, H. Kang, X. Qiao, Y. Liu, Y. Li, X. Wu and W. Qin, CoNi nano-alloys modified yolk-shell structure carbon cage via *Saccharomyces* as carbon template for efficient oxygen evolution reaction, *Appl. Catal., B*, 2022,

**315**, 121551.

10. J. Dong, Y. Lu, X. Tian, F.-Q. Zhang, S. Chen, W. Yan, H.-L. He, Y. Wang, Y.-B. Zhang, Y. Qin, M. Sui, X.-M. Zhang and X. Fan, Genuine active species generated from Fe<sub>3</sub>N nanotube by synergistic CoNi doping for boosted oxygen evolution catalysis, *Small*, 2020, **16**, 2003824.
11. K. Fan, H. Chen, Y. Ji, H. Huang, P. M. Claesson, Q. Daniel, B. Philippe, H. Rensmo, F. Li, Y. Luo and L. Sun, Nickel-vanadium monolayer double hydroxide for efficient electrochemical water oxidation, *Nat. Commun.*, 2016, **7**, 11981.
12. H. Liang, F. Meng, M. Cabán-Acevedo, L. Li, A. Forticaux, L. Xiu, Z. Wang and S. Jin, Hydrothermal continuous flow synthesis and exfoliation of NiCo layered double hydroxide nanosheets for enhanced oxygen evolution catalysis, *Nano Lett.*, 2015, **15**, 1421-1427.
13. B. Wang, C. Tang, H.-F. Wang, X. Chen, R. Cao and Q. Zhang, A nanosized CoNi hydroxide@Hhydroxysulfide core-shell heterostructure for enhanced oxygen evolution, *Adv. Mater.*, 2019, **31**, 1805658.
14. D. Li, T. Li, G. Hao, W. Guo, S. Chen, G. Liu, J. Li and Q. Zhao, IrO<sub>2</sub> nanoparticle-decorated single-layer NiFe LDHs nanosheets with oxygen vacancies for the oxygen evolution reaction, *Chem. Eng. J.*, 2020, **399**, 125738.
15. J. Li, L. Wang, H. He, Y. Chen, Z. Gao, N. Ma, B. Wang, L. Zheng, R. Li, Y. Wei, J. Xu, Y. Xu, B. Cheng, Z. Yin and D. Ma, Interface construction of NiCo LDH/NiCoS based on the 2D ultrathin nanosheet towards oxygen evolution reaction, *Nano Res.*, 2022, **15**, 4986-4995.
